# Supplementary material for: The Effects of Federal Parity on Mental Health Services Use and Spending: Evidence From the Medical Expenditure Panel Survey
Source: Atypon-hosted journal article supplement (doi:10.1176/appi.ps.201800313), 2019-01-29
Supplement: appi.ps.201800313.ds001.pdf [file appi.ps.201800313.ds001.pdf]

**Appendix Table 1: Sample Sizes for Analytic Samples by Outcome**

| Outcome                     | MEPS Self-Administered Questionnaire Respondents |                        |                           |
|-----------------------------|--------------------------------------------------|------------------------|---------------------------|
|                             | All                                              | Serious Mental Illness | No Serious Mental Illness |
| Mental Health Use           | 66,602                                           | 3,653                  | 62,949                    |
| Visits and Expenditures     | 66,602                                           | 3,653                  | 62,949                    |
| Visits with Specialist      | 4,201                                            | 2,327                  | 1,874                     |
| Total Expenditures OOP      | 4,088                                            | 2,284                  | 1,804                     |
| Specialist Expenditures OOP | 2,198                                            | 1,310                  | 888                       |
| PCP Expenditures OOP        | 1,809                                            | 1,112                  | 697                       |

Notes: Sample sizes correspond to outcomes shown in Tables 2 and 3.

**Appendix Table 2: Model Results with K6 Score Included as a Regressor**

|                                 | MEPS Self-Administered Questionnaire Respondents |                |                     |                        |                |                     |                           |                |                     |
|---------------------------------|--------------------------------------------------|----------------|---------------------|------------------------|----------------|---------------------|---------------------------|----------------|---------------------|
|                                 | All                                              |                |                     | Serious Mental Illness |                |                     | No Serious Mental Illness |                |                     |
|                                 | Coeff.                                           | Standard Error | Confidence Interval | Coeff.                 | Standard Error | Confidence Interval | Coeff.                    | Standard Error | Confidence Interval |
| <b>Mental Health Use</b>        |                                                  |                |                     |                        |                |                     |                           |                |                     |
| Any                             | -.099                                            | .681           | -1.438-1.239        | 1.67                   | 3.847          | -5.891-9.231        | -.369                     | .555           | -1.458-.721         |
| Mental Health Specialist        | .426                                             | .571           | -.697-1.549         | 6.829                  | 4.922          | -2.845-16.503       | -.008                     | .379           | -.753-.737          |
| Primary Care Provider           | -.212                                            | .395           | -.988-.563          | -5.697                 | 4.357          | -14.260-2.867       | -.004                     | .262           | -.518-.511          |
| <b>Visits and Expenditures</b>  |                                                  |                |                     |                        |                |                     |                           |                |                     |
| Visits (#)                      | -.001                                            | .016           | -.031-.030          | .049                   | .137           | -.220-.317          | -.007                     | .011           | -.029-.016          |
| Total Expenditures (\$)         | -.003                                            | .047           | -.095-.090          | .099                   | .306           | -.503-.701          | -.019                     | .036           | -.090-.053          |
| Out-of-Pocket Expenditures (\$) | -.024                                            | .036           | -.094-.047          | -.041                  | .288           | -.606-.524          | -.031                     | .028           | -.085-.023          |
| <b>Percentages (%)</b>          |                                                  |                |                     |                        |                |                     |                           |                |                     |
| Visits with Specialist          | 9.342*                                           | 4.775          | -.046-18.729        | 10.587*                | 6.012          | -1.231-22.406       | 9.623                     | 6.056          | -2.284-21.530       |
| Total Expenditures OOP          | -3.734                                           | 3.317          | -10.256-2.787       | -1.119                 | 4.269          | -9.511-7.272        | -7.100                    | 4.463          | -15.876-1.675       |
| Specialist Expenditures OOP     | -2.346                                           | 4.621          | -11.434-6.742       | -2.175                 | 6.110          | -14.191-9.842       | -4.592                    | 6.159          | -16.714-7.530       |
| PCP Expenditures OOP            | -4.600                                           | 3.754          | -11.982-2.783       | -5.168                 | 4.664          | -14.340-4.004       | -3.551                    | 5.798          | -14.960-7.858       |

\* p < 0.1

Notes: Mental health use models are estimated with linear probability models. All other models are estimated with ordinary least squares. Total expenditures, out-of-pocket expenditures, and visits are transformed with an inverse hyperbolic sine transformation, which behaves similarly to a log transformation. All models are estimated with self-administered questionnaire survey weights and are adjusted for survey design with probability sampling units and strata.

**Appendix Table 3: Average Marginal Effects of the MHPAEA on Mental Health Utilization and Expenditures by Presence of Serious Mental Illness with Visits and Expenditures Estimated with Negative Binomial Models and Percentages Estimated with Fractional Logistic Regression Models**

|                                 | MEPS Self-Administered Questionnaire Respondents |                        |                           |
|---------------------------------|--------------------------------------------------|------------------------|---------------------------|
|                                 | All                                              | Serious Mental Illness | No Serious Mental Illness |
|                                 | Average Marginal Effect                          |                        |                           |
| <b>Visits and Expenditures</b>  |                                                  |                        |                           |
| Visits (#)                      | .016                                             | .241                   | -.007                     |
| Total Expenditures (\$)         | 9.417                                            | 169.114                | -2.846                    |
| Out-of-Pocket Expenditures (\$) | 3.796                                            | 60.794                 | .086                      |
| <b>Percentages (%)</b>          |                                                  |                        |                           |
| Visits with Specialist          | 8.756                                            | 9.798                  | 9.253                     |
| Total Expenditures OOP          | -3.362                                           | -.485                  | -7.118                    |
| Specialist Expenditures OOP     | -1.25                                            | -.194                  | -4.078                    |
| PCP Expenditures OOP            | -5.183                                           | -5.783                 | -4.21                     |

\*  $p < 0.1$

Notes: Mental health use models are estimated with linear probability models. Total expenditures, out-of-pocket expenditures, and visit models are estimated with negative binomial models. Proportions of visits with specialists and total/specialist/PCP expenditures that are OOP are estimated with fractional regression models. All models are estimated with self-administered questionnaire survey weights and are adjusted for survey design with probability sampling units and strata. Average marginal effects are calculated as described in Karaca-Mandic, Norton, and Dowd (2012).

**Appendix Table 4: Model Results with Serious Mental Illness Defined Only According to the K6**

|                                 | MEPS Self-Administered Questionnaire Respondents |                |                     |                        |                |                     |                           |                |                     |
|---------------------------------|--------------------------------------------------|----------------|---------------------|------------------------|----------------|---------------------|---------------------------|----------------|---------------------|
|                                 | All                                              |                |                     | Serious Mental Illness |                |                     | No Serious Mental Illness |                |                     |
|                                 | Coeff.                                           | Standard Error | Confidence Interval | Coeff.                 | Standard Error | Confidence Interval | Coeff.                    | Standard Error | Confidence Interval |
| <b>Mental Health Use</b>        |                                                  |                |                     |                        |                |                     |                           |                |                     |
| Any                             | -.041                                            | .691           | -1.398-1.316        | .425                   | 6.689          | -12.725-13.576      | .011                      | .697           | -1.358-1.381        |
| Mental Health Specialist        | .457                                             | .573           | -0.668-1.583        | -.756                  | 6.197          | -12.94-11.428       | .561                      | .559           | -0.538-1.66         |
| Primary Care Provider           | -.124                                            | .404           | -0.918-0.67         | -4.107                 | 5.051          | -14.037-5.823       | -.021                     | .391           | -0.789-0.747        |
| <b>Visits and Expenditures</b>  |                                                  |                |                     |                        |                |                     |                           |                |                     |
| Visits (#)                      | .001                                             | .016           | -0.03-0.032         | -.167                  | .199           | -0.558-0.224        | .007                      | .015           | -0.023-0.037        |
| Total Expenditures (\$)         | .002                                             | .047           | -0.091-0.095        | -.214                  | .505           | -1.206-0.777        | .013                      | .047           | -0.079-0.105        |
| Out-of-Pocket Expenditures (\$) | -.018                                            | .036           | -0.089-0.054        | -.405                  | .401           | -1.193-0.383        | -.005                     | .035           | -0.074-0.064        |
| <b>Percentages (%)</b>          |                                                  |                |                     |                        |                |                     |                           |                |                     |
| Visits with Specialist          | 8.771*                                           | 4.847          | -0.757-18.300       | 3.006                  | 11.317         | -19.272-25.283      | 10.578**                  | 5.166          | 0.421-20.735        |
| Total Expenditures OOP          | -3.205                                           | 3.261          | -9.615-3.205        | -11.440*               | 6.537          | -24.308-1.428       | -2.309                    | 3.527          | -9.243-4.626        |
| Specialist Expenditures OOP     | -1.150                                           | 4.509          | -10.019-7.718       | -13.333                | 8.635          | -30.350-3.683       | -.369                     | 4.858          | -9.924-9.185        |
| PCP Expenditures OOP            | -4.860                                           | 3.709          | -12.155-2.434       | -5.739                 | 10.087         | -25.643-14.164      | -3.824                    | 4.002          | -11.694-4.045       |

\* p < 0.1, \*\* p < 0.05

Notes: Mental health use models are estimated with linear probability models. All other models are estimated with ordinary least squares. Total expenditures, out-of-pocket expenditures, and visits are transformed with an inverse hyperbolic sine transformation, which behaves similarly to a log transformation. All models are estimated with self-administered questionnaire survey weights and are adjusted for survey design with probability sampling units and strata.
